# Supplementary material for: Proof of Concept of a 6-Month Person-Oriented Exercise Intervention ‘MultiPill-Exercise’ among Patients at Risk of or with Multiple Chronic Diseases: Results of a One-Group Pilot Trial
Source: MDPI journal article supplement (doi:10.3390/ijerph19159469), 2022-08-02
Supplement: s1 [file s1]

Table S1: Medication Survey. This questionnaire reported the medication of the last two weeks prior to the questionnaire.

| Medication                                                                        |              | t0     | t3     | t6     |
|-----------------------------------------------------------------------------------|--------------|--------|--------|--------|
| High Blood Pressure                                                               | Yes          | 24     | 20     | 16     |
|                                                                                   | No           | 15     | 15     | 16     |
|                                                                                   | Unknown / MV | 0 / 0  | 0 / 4  | 0 / 7  |
| High Blood Cholesterol                                                            | Yes          | 6      | 5      | 7      |
|                                                                                   | No           | 24     | 26     | 23     |
|                                                                                   | Unknown / MV | 1 / 8  | 0 / 10 | 1 / 8  |
| Angina or Chest Pain                                                              | Yes          | 0      | 0      | 0      |
|                                                                                   | No           | 30     | 30     | 27     |
|                                                                                   | Unknown / MV | 0 / 9  | 0 / 9  | 0 / 12 |
| Control of Heart Rhythm                                                           | Yes          | 2      | 0      | 0      |
|                                                                                   | No           | 27     | 29     | 27     |
|                                                                                   | Unknown / MV | 1 / 9  | 1 / 9  | 0 / 12 |
| Heart Failure                                                                     | Yes          | 0      | 0      | 0      |
|                                                                                   | No           | 28     | 29     | 27     |
|                                                                                   | Unknown / MV | 1 / 10 | 1 / 9  | 0 / 12 |
| Blood Thinning                                                                    | Yes          | 4      | 4      | 3      |
|                                                                                   | No           | 27     | 27     | 26     |
|                                                                                   | Unknown / MV | 0 / 8  | 0 / 8  | 0 / 10 |
| Diabetes or High Blood Sugar                                                      | Yes          | 3      | 3      | 2      |
|                                                                                   | No           | 28     | 28     | 25     |
|                                                                                   | Unknown / MV | 0 / 8  | 0 / 8  | 0 / 12 |
| Stroke                                                                            | Yes          | 0      | 0      | 0      |
|                                                                                   | No           | 30     | 30     | 27     |
|                                                                                   | Unknown / MV | 0 / 9  | 0 / 9  | 0 / 12 |
| Leg pain when walking                                                             | Yes          | 4      | 2      | 3      |
|                                                                                   | No           | 26     | 28     | 25     |
|                                                                                   | Unknown / MV | 0 / 9  | 1 / 8  | 0 / 11 |
| Aspirin, Alka-Seltzer, cold medicine or headache powder                           | Yes          | 10     | 11     | 10     |
|                                                                                   | No           | 29     | 25     | 22     |
|                                                                                   | Unknown / MV | 0 / 0  | 0 / 3  | 0 / 7  |
| Medication for Arthritis, fever, or muscle aches and pains, (or menstrual cramps) | Yes          | 3      | 8      | 6      |
|                                                                                   | No           | 35     | 28     | 26     |
|                                                                                   | Unknown / MV | 1 / 0  | 0 / 3  | 0 / 7  |
| Non-steroidal anti-inflammatory drugs                                             | Yes          | 6      | 4      | 3      |
|                                                                                   | No           | 32     | 31     | 28     |
|                                                                                   | Unknown / MV | 1 / 0  | 1 / 3  | 1 / 7  |

Medication survey according to ARIC Medication survey form [1]

1. Investigators, T.A. The Atherosclerosis Risk in Communities (ARIC) Study: design and objectives. The ARIC investigators. *Am J Epidemiol* **1989**, 129, 687-702.
