# Supplementary material for: Proof of Concept of a 6-Month Person-Oriented Exercise Intervention ‘MultiPill-Exercise’ among Patients at Risk of or with Multiple Chronic Diseases: Results of a One-Group Pilot Trial
Source: MDPI journal article supplement (doi:10.3390/ijerph19159469), 2022-08-02
Supplement: s1 [file s1]

Sensitivity analysis without Multiple Imputation:

Complete Case Population ( $n = 29$ )

```
> summary(mod.1)
```

Model:

LD F1 Model

Call:

```
sports ~ Messzeitpunkte_num
```

Relative Treatment Effect (RTE):

|                     | RankMeans | Nobs | RTE       |
|---------------------|-----------|------|-----------|
| Messzeitpunkte_num1 | 21.27586  | 29   | 0.2388030 |
| Messzeitpunkte_num2 | 59.25862  | 29   | 0.6753864 |
| Messzeitpunkte_num3 | 51.46552  | 29   | 0.5858105 |

Wald-Type Statistic (WTS):

|                    | Statistic | df | p-value      |
|--------------------|-----------|----|--------------|
| Messzeitpunkte_num | 113.2472  | 2  | 2.562602e-25 |

ANOVA-Type Statistic (ATS):

|                    | Statistic | df       | p-value      |
|--------------------|-----------|----------|--------------|
| Messzeitpunkte_num | 37.35112  | 1.783427 | 2.174489e-15 |

#hypothesis  $H_0$  (T) of no time effect is tested with WTS and ATS --> overall significant so there is a time effect

Posthoc:

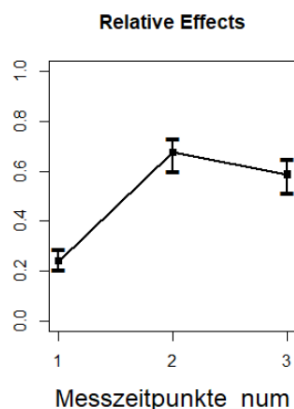

```
> #zeit 2 vs baseline 1
> p.out12.sensi
[1] 2.800301e-18
> #zeit 3 vs baseline 1
> p.out13.sensi
[1] 6.166443e-14
> #zeit 3 vs zeit 2
> p.out23.sensi
[1] 0.1695568
```

Bonferroni adjusted: t2 vs t3 corrected,  $p = 0.5086703$
